# Supplementary material for: Effects of age and reproductive status on individual foraging site fidelity in a long-lived marine predator
Source: PubMed Central journal article supplement (PMC5543227; doi:10.1098/rspb.2017.1068), 2017-07-26

**Electronic supplementary material, Table 1.** Tracking data including in final analysis. Including here, the coefficient of relative plasticity (CRP), calculated for each individual as the ratio of the individual variance over the overall variance for each group. 0 = highly repeatable, 1 = low repeatability.

| Individual                       | Sex    | #trips | year | Coefficient of Relative Plasticity            |                                                |                                                |                                                |                                                |
|----------------------------------|--------|--------|------|-----------------------------------------------|------------------------------------------------|------------------------------------------------|------------------------------------------------|------------------------------------------------|
|                                  |        |        |      | Term. lat                                     | Term. long                                     | Term. dist.                                    | Total dist.                                    | Trip duration                                  |
| <b>Immatures (n=15)</b>          |        |        |      |                                               |                                                |                                                |                                                |                                                |
| 57619                            | female | 4      | 2010 | 0.007                                         | 0.166                                          | 0.077                                          | 0.053                                          | N/A                                            |
| 57620                            | female | 4      | 2010 | 0.608                                         | 0.248                                          | 0.237                                          | 0.244                                          | N/A                                            |
| 57621                            | female | 4      | 2010 | 0.606                                         | 0.330                                          | 0.178                                          | 0.205                                          | N/A                                            |
| 57628                            | female | 4      | 2010 | 0.269                                         | 0.196                                          | 0.379                                          | 0.325                                          | N/A                                            |
| 57631                            | female | 4      | 2010 | 0.410                                         | 0.024                                          | 0.403                                          | 0.777                                          | N/A                                            |
| 57633                            | female | 4      | 2010 | 0.098                                         | 0.388                                          | 0.228                                          | 0.280                                          | N/A                                            |
| 57634                            | male   | 4      | 2010 | 0.417                                         | 0.266                                          | 0.242                                          | 0.292                                          | N/A                                            |
| 57643                            | male   | 2      | 2010 | 1.000                                         | 1.000                                          | 1.000                                          | 1.000                                          | N/A                                            |
| G394                             | male   | 4      | 2015 | 0.007                                         | 0.042                                          | 0.017                                          | 0.034                                          | 0.094                                          |
| G395                             | female | 5      | 2015 | 0.137                                         | 0.291                                          | 0.107                                          | 0.151                                          | 0.362                                          |
| G401                             | male   | 3      | 2015 | 0.010                                         | 0.117                                          | 0.042                                          | 0.057                                          | 0.094                                          |
| G407                             | female | 4      | 2015 | 0.173                                         | 0.047                                          | 0.090                                          | 0.086                                          | 0.190                                          |
| G429                             | male   | 5      | 2016 | 0.053                                         | 0.140                                          | 0.029                                          | 0.112                                          | 0.266                                          |
| G430                             | male   | 7      | 2016 | 0.088                                         | 0.159                                          | 0.111                                          | 0.329                                          | 1.000                                          |
| G433                             | male   | 8      | 2016 | 0.102                                         | 0.153                                          | 0.072                                          | 0.113                                          | 0.302                                          |
| <b>Mean (<math>\pm</math>SE)</b> |        |        |      | <b>0.266</b><br><b>(<math>\pm</math>.069)</b> | <b>0.238</b><br><b>(<math>\pm</math>0.057)</b> | <b>0.214</b><br><b>(<math>\pm</math>0.059)</b> | <b>0.201</b><br><b>(<math>\pm</math>0.066)</b> | <b>0.329</b><br><b>(<math>\pm</math>0.102)</b> |
| <b>Failed breeders (n=5)</b>     |        |        |      |                                               |                                                |                                                |                                                |                                                |
| G071                             | male   | 3      | 2015 | 0.104                                         | 0.002                                          | 0.041                                          | 0.020                                          | 0.012                                          |
| G075                             | male   | 4      | 2015 | 0.052                                         | 0.080                                          | 0.020                                          | 0.010                                          | 0.009                                          |
| G135                             | male   | 2      | 2015 | 0.000                                         | 0.010                                          | 0.002                                          | 0.000                                          | 0.000                                          |
| G278                             | female | 2      | 2015 | 0.009                                         | 0.002                                          | 0.009                                          | 0.013                                          | 0.029                                          |
| G323                             | female | 4      | 2015 | 0.000                                         | 0.009                                          | 0.003                                          | 0.002                                          | 0.001                                          |
| <b>Mean (<math>\pm</math>SE)</b> |        |        |      | <b>0.033</b><br><b>(<math>\pm</math>0.02)</b> | <b>0.021</b><br><b>(<math>\pm</math>0.015)</b> | <b>0.015</b><br><b>(<math>\pm</math>0.001)</b> | <b>0.009</b><br><b>(<math>\pm</math>0.004)</b> | <b>0.010</b><br><b>(<math>\pm</math>0.005)</b> |
| <b>Breeders (n=46)</b>           |        |        |      |                                               |                                                |                                                |                                                |                                                |
| G004                             | male   | 4      | 2010 | 0.025                                         | 0.111                                          | 0.032                                          | 0.040                                          | 0.021                                          |
| G006                             | male   | 4      | 2010 | 0.017                                         | 0.051                                          | 0.028                                          | 0.019                                          | 0.008                                          |
| G009                             | male   | 3      | 2010 | 0.001                                         | 0.004                                          | 0.001                                          | 0.013                                          | 0.020                                          |
| G010                             | male   | 3      | 2010 | 0.035                                         | 0.011                                          | 0.035                                          | 0.038                                          | 0.018                                          |
| G011                             | male   | 5      | 2010 | 0.121                                         | 0.187                                          | 0.216                                          | 0.116                                          | 0.027                                          |
| G013                             | male   | 3      | 2010 | 0.008                                         | 0.035                                          | 0.015                                          | 0.007                                          | 0.000                                          |
| G015                             | female | 4      | 2010 | 0.002                                         | 0.015                                          | 0.008                                          | 0.007                                          | 0.007                                          |
| G016                             | male   | 4      | 2010 | 0.000                                         | 0.001                                          | 0.001                                          | 0.001                                          | 0.003                                          |
| G019                             | female | 8      | 2010 | 0.052                                         | 0.051                                          | 0.078                                          | 0.039                                          | 0.045                                          |
| G022                             | female | 3      | 2010 | 0.017                                         | 0.005                                          | 0.013                                          | 0.007                                          | 0.004                                          |
| G024                             | female | 3      | 2010 | 0.054                                         | 0.008                                          | 0.063                                          | 0.028                                          | 0.011                                          |
| G025                             | male   | 3      | 2010 | 0.010                                         | 0.012                                          | 0.014                                          | 0.001                                          | 0.000                                          |
| G026                             | male   | 3      | 2010 | 0.020                                         | 0.008                                          | 0.021                                          | 0.010                                          | 0.002                                          |
| G027                             | male   | 4      | 2010 | 0.000                                         | 0.021                                          | 0.003                                          | 0.005                                          | 0.009                                          |
| G030                             | male   | 6      | 2010 | 0.248                                         | 0.163                                          | 0.315                                          | 0.187                                          | 0.038                                          |
| G031                             | female | 4      | 2010 | 0.088                                         | 0.017                                          | 0.083                                          | 0.052                                          | 0.009                                          |
| G032                             | male   | 4      | 2010 | 0.046                                         | 0.041                                          | 0.036                                          | 0.021                                          | 0.008                                          |
| G033                             | male   | 3      | 2010 | 0.046                                         | 0.041                                          | 0.039                                          | 0.023                                          | 0.000                                          |
| G037                             | male   | 3      | 2010 | 0.011                                         | 0.002                                          | 0.012                                          | 0.007                                          | 0.008                                          |
| G038                             | male   | 4      | 2010 | 0.002                                         | 0.002                                          | 0.001                                          | 0.003                                          | 0.004                                          |

|                                  |        |   |      |                                                |                                                |                                                |                                                |                                                |
|----------------------------------|--------|---|------|------------------------------------------------|------------------------------------------------|------------------------------------------------|------------------------------------------------|------------------------------------------------|
| G359                             | female | 2 | 2015 | 0.001                                          | 0.000                                          | 0.001                                          | 0.002                                          | 0.001                                          |
| G368                             | male   | 2 | 2015 | 0.002                                          | 0.004                                          | 0.003                                          | 0.001                                          | 0.000                                          |
| G372                             | male   | 2 | 2015 | 0.097                                          | 0.099                                          | 0.004                                          | 0.001                                          | 0.003                                          |
| G374                             | male   | 2 | 2015 | 0.000                                          | 0.027                                          | 0.008                                          | 0.023                                          | 0.018                                          |
| G376                             | male   | 2 | 2015 | 0.014                                          | 0.004                                          | 0.000                                          | 0.002                                          | 0.003                                          |
| G379                             | male   | 2 | 2015 | 0.001                                          | 0.000                                          | 0.000                                          | 0.000                                          | 0.004                                          |
| G385                             | female | 3 | 2015 | 0.001                                          | 0.020                                          | 0.008                                          | 0.004                                          | 0.003                                          |
| G386                             | male   | 3 | 2015 | 0.005                                          | 0.002                                          | 0.005                                          | 0.005                                          | 0.006                                          |
| G388                             | male   | 3 | 2015 | 0.021                                          | 0.007                                          | 0.022                                          | 0.012                                          | 0.004                                          |
| G413                             | female | 2 | 2016 | 0.005                                          | 0.003                                          | 0.004                                          | 0.001                                          | 0.000                                          |
| G415                             | male   | 4 | 2016 | 0.032                                          | 0.001                                          | 0.031                                          | 0.013                                          | 0.007                                          |
| G424                             | female | 2 | 2016 | 0.002                                          | 0.010                                          | 0.007                                          | 0.002                                          | 0.003                                          |
| G434                             | male   | 2 | 2016 | 0.066                                          | 0.001                                          | 0.046                                          | 0.026                                          | 0.013                                          |
| G435                             | female | 2 | 2016 | 0.039                                          | 0.018                                          | 0.046                                          | 0.040                                          | 0.080                                          |
| G441                             | male   | 2 | 2016 | 0.042                                          | 0.022                                          | 0.048                                          | 0.027                                          | 0.008                                          |
| G444                             | male   | 2 | 2016 | 0.000                                          | 0.000                                          | 0.000                                          | 0.000                                          | 0.000                                          |
| G446                             | female | 2 | 2016 | 0.007                                          | 0.013                                          | 0.005                                          | 0.002                                          | 0.002                                          |
| G447                             | male   | 2 | 2016 | 0.000                                          | 0.003                                          | 0.000                                          | 0.001                                          | 0.004                                          |
| G450                             | female | 2 | 2016 | 0.005                                          | 0.035                                          | 0.011                                          | 0.006                                          | 0.010                                          |
| G451                             | female | 2 | 2016 | 0.002                                          | 0.009                                          | 0.006                                          | 0.003                                          | 0.003                                          |
| G454                             | female | 2 | 2016 | 0.017                                          | 0.006                                          | 0.001                                          | 0.001                                          | 0.000                                          |
| G458                             | female | 2 | 2016 | 0.000                                          | 0.001                                          | 0.000                                          | 0.003                                          | 0.023                                          |
| G461                             | male   | 4 | 2016 | 0.004                                          | 0.017                                          | 0.011                                          | 0.010                                          | 0.008                                          |
| G464                             | male   | 3 | 2016 | 0.016                                          | 0.012                                          | 0.016                                          | 0.016                                          | 0.050                                          |
| G466                             | male   | 2 | 2016 | 0.002                                          | 0.000                                          | 0.002                                          | 0.002                                          | 0.002                                          |
| G469                             | male   | 5 | 2016 | 0.005                                          | 0.004                                          | 0.003                                          | 0.005                                          | 0.005                                          |
| <b>Mean (<math>\pm</math>SE)</b> |        |   |      | <b>0.026</b><br><b>(<math>\pm</math>0.006)</b> | <b>0.024</b><br><b>(<math>\pm</math>0.001)</b> | <b>0.028</b><br><b>(<math>\pm</math>0.008)</b> | <b>0.018</b><br><b>(<math>\pm</math>0.004)</b> | <b>0.011</b><br><b>(<math>\pm</math>0.002)</b> |

**Electronic supplementary material, Figure 1.** Plots of NND (mean±SE) for gannets tracked during multiple trips. (a) Within-individual route similarity for each group, by sex and (b) among-individuals only, for each group, by sex. Different females followed less similar routes than different males, in both breeders and immatures, and females also showing less route fidelity than males (at least in immatures, although less clear in adults).

(a)

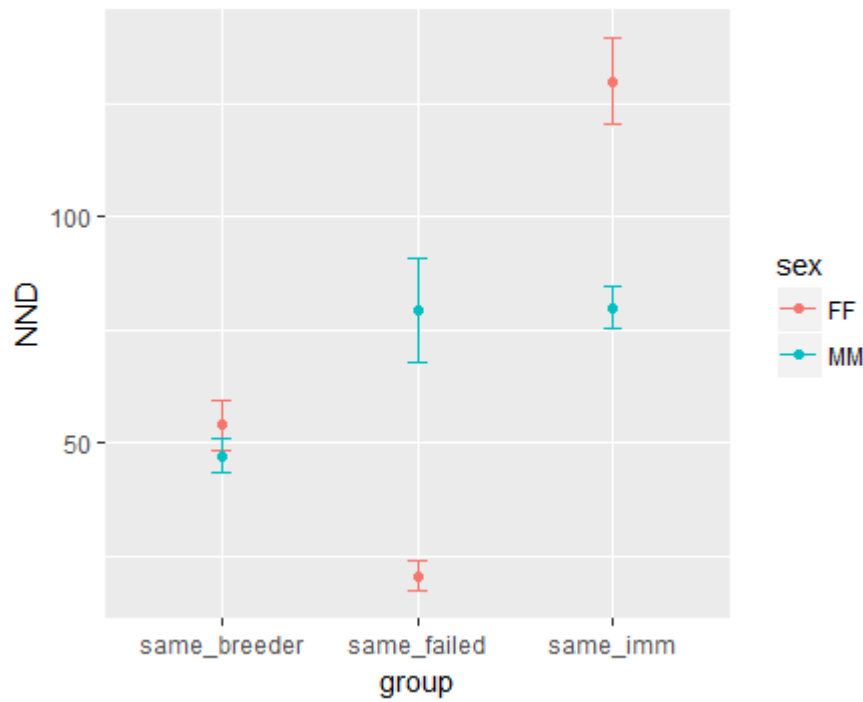

(b)

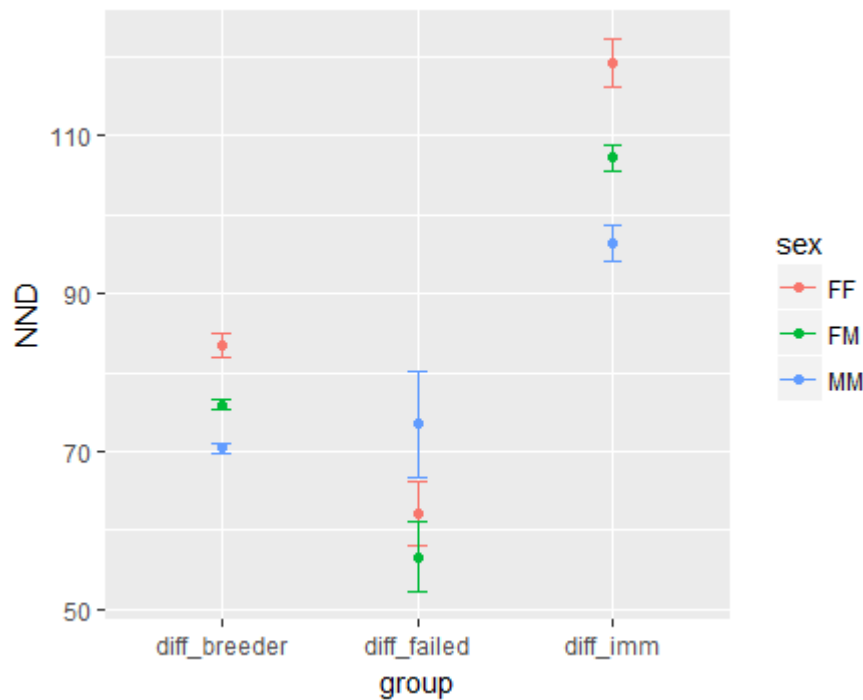

**Electronic supplementary material, Figure 2.** Repeat foraging tracks of ( $n=46$ ) chick-rearing northern gannets from Grassholm, UK July/August 2010, 2015 and 2016 generated from GPS loggers on a 2 minute duty cycle. Tracks are colour-coded by number: track 1=black; track 2=blue; track 3=red; track 4 = green; track 5 = purple; track 6=yellow. Data is presented for 15 females and 31 males.

G006 - breeding male (2010, n = 4 trips)

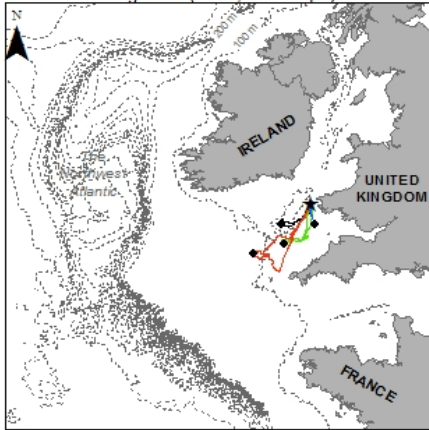

G004 - breeding male (2010, n = 4 trips)

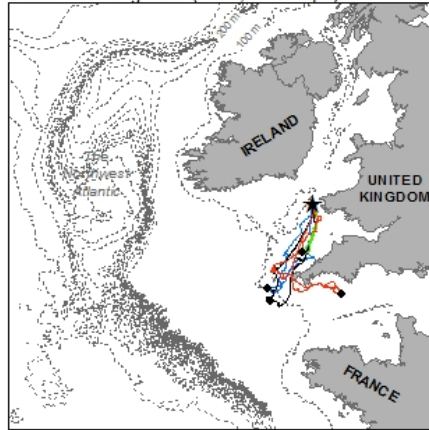

G009 - breeding male (2010, n = 3 trips)

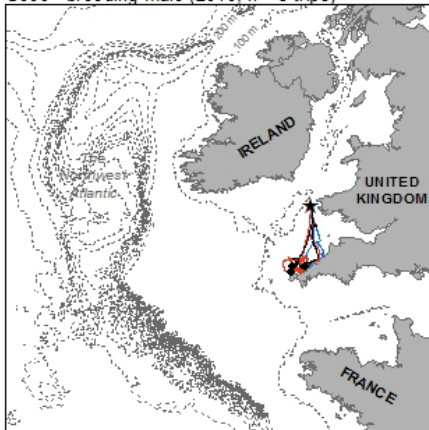

G010 - breeding male (2010, n = 3 trips)

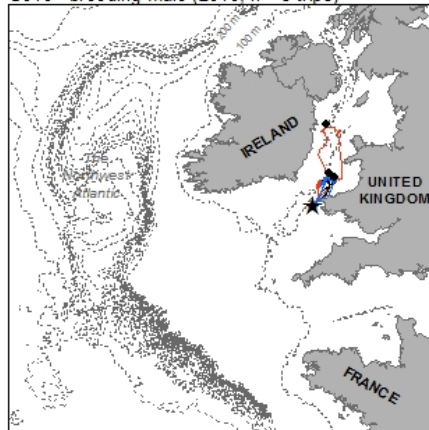

G016 - breeding male (2010, n = 4 trips)

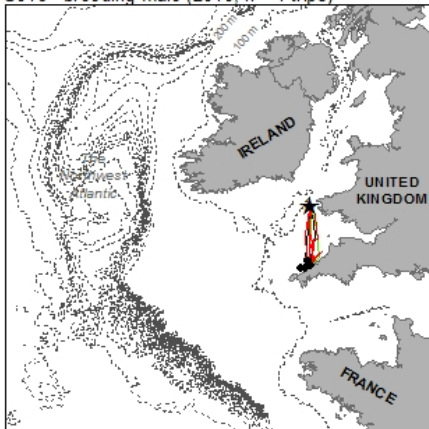

G013 - breeding male (2010, n = 3 trips)

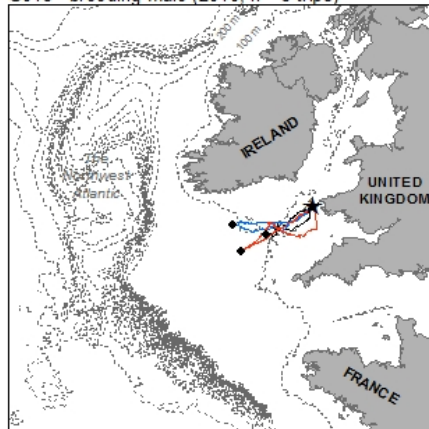

G025 - male (2010, n = 3 trips)

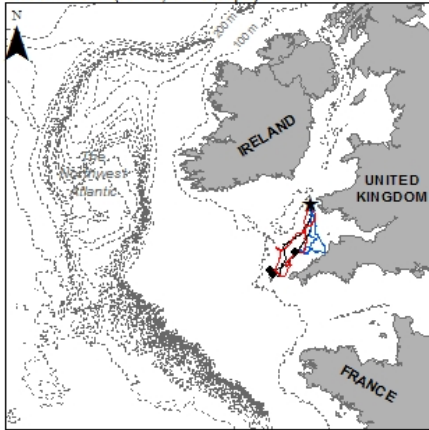

G026 - male (2010, n = 3 trips)

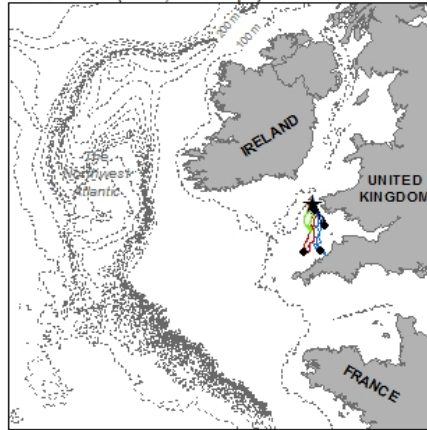

G027 - male (2010, n = 4 trips)

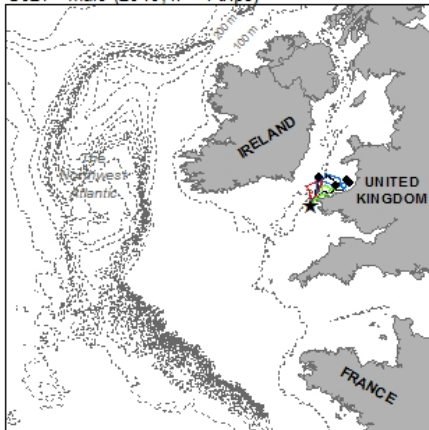

G030 - male (2010, n = 6 trips)

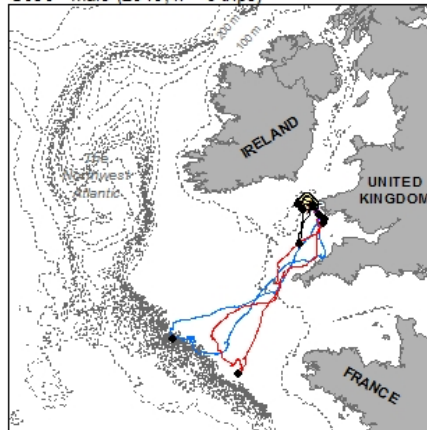

G032 - male (2010, n = 4 trips)

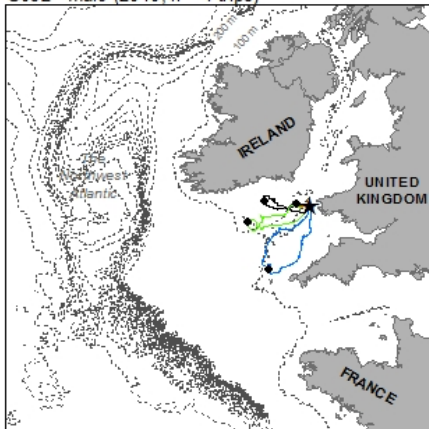

G033 - male (2010, n = 3 trips)

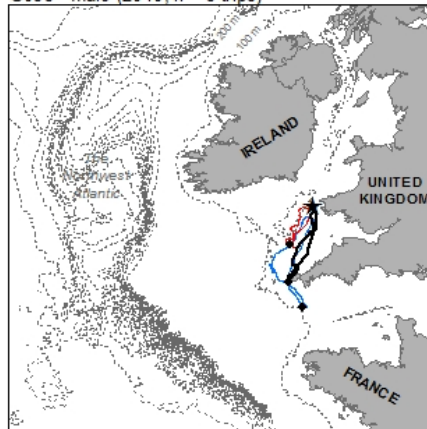

G015 - breeding female (2010, n = 4 trips)

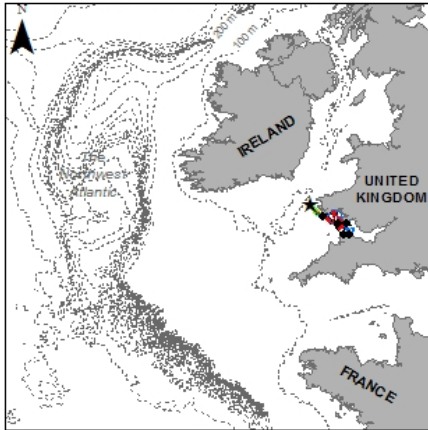

G022 - breeding female (2010, n = 3 trips)

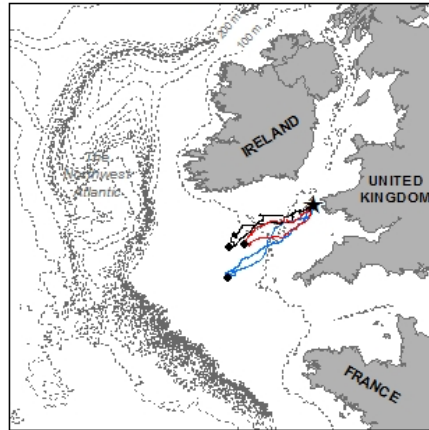

G024 - breeding female (2010, n = 3 trips)

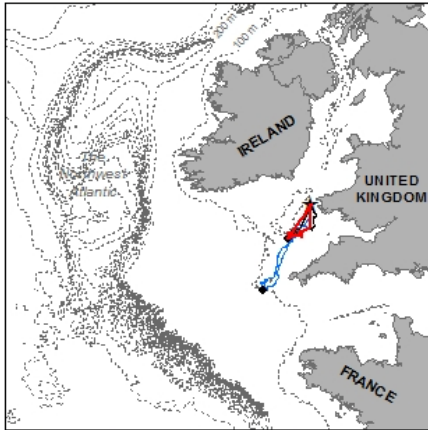

G031 - breeding female (2010, n = 4 trips)

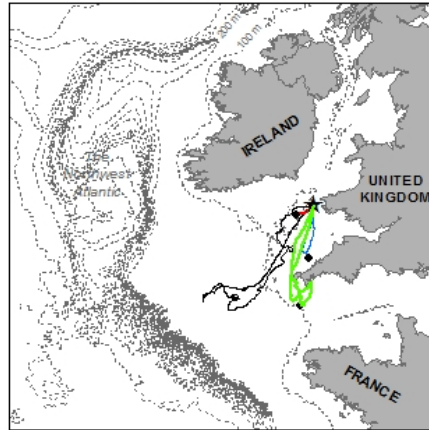

G037 - breeding male (2010, n = 3 trips)

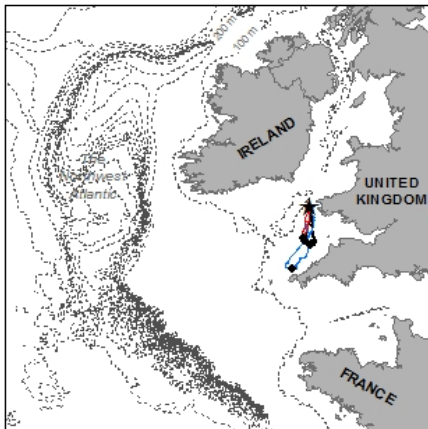

G038 - breeding male (2010, n = 4 trips)

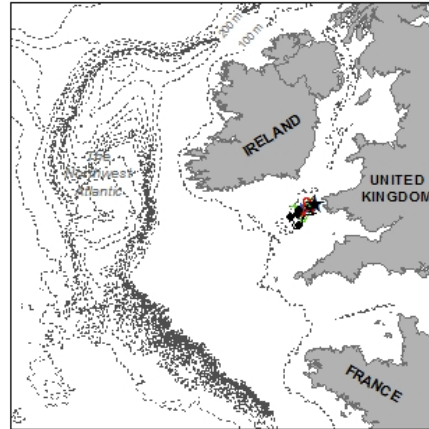

G376 - breeding male (2015, n = 2 trips)

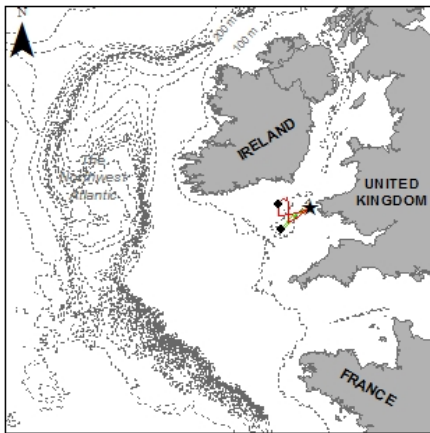

G379 - breeding male (2015, n = 2 trips)

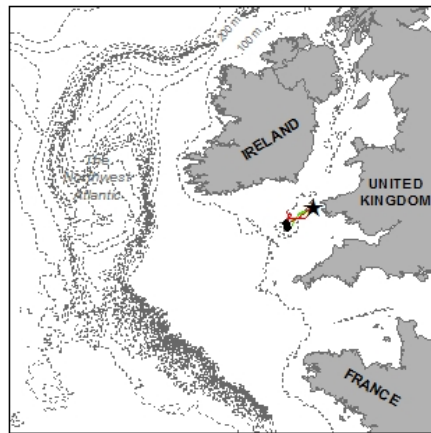

G385 - breeding female (2015, n = 3 trips)

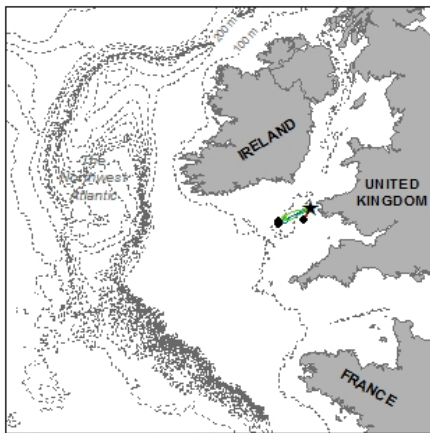

G386 - breeding male (2015, n = 3 trips)

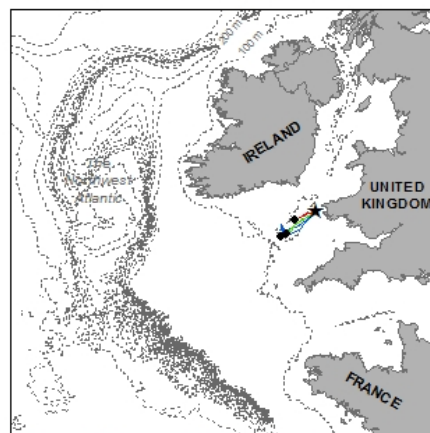

G388 - breeding male (2015, n = 3 trips)

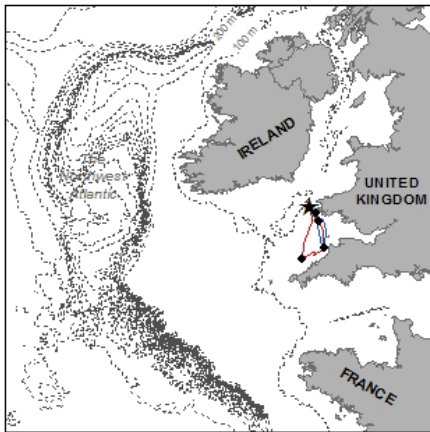

G374 - breeding male (2015, n = 2 trips)

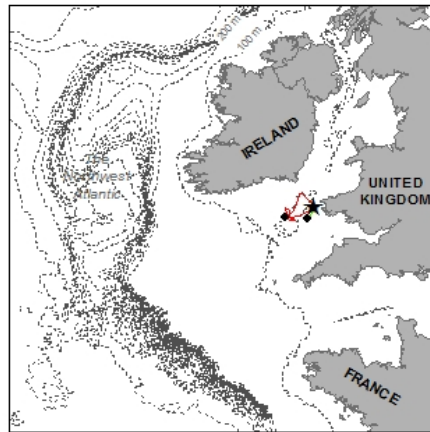



G413 - breeding female (2016, n = 2 trips)

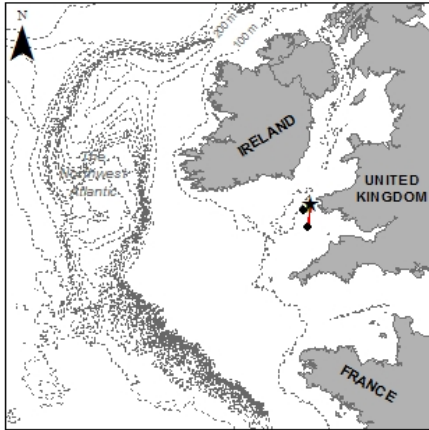

G424 - breeding female (2016, n = 2 trips)

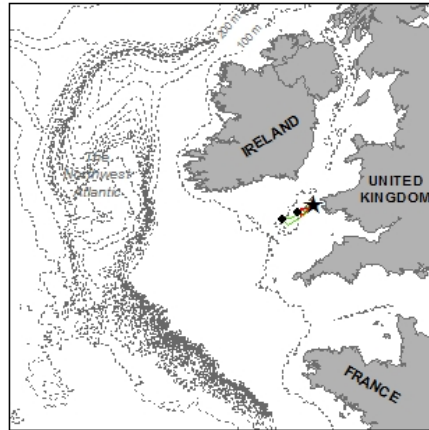

G435 - breeding female (2016, n = 2 trips)

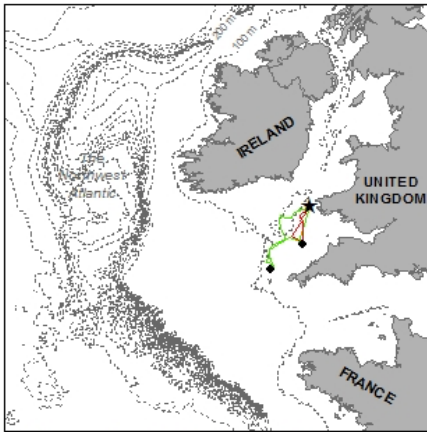

G441 - breeding male (2016, n = 2 trips)

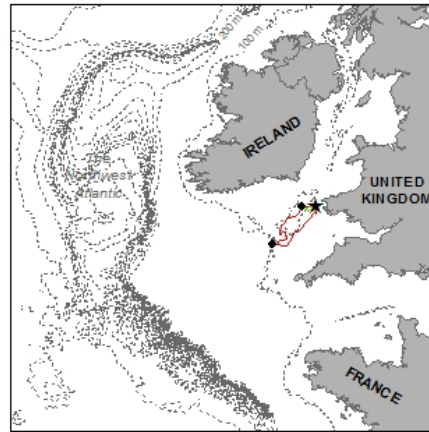

G444 - breeding male (2016, n = 2 trips)

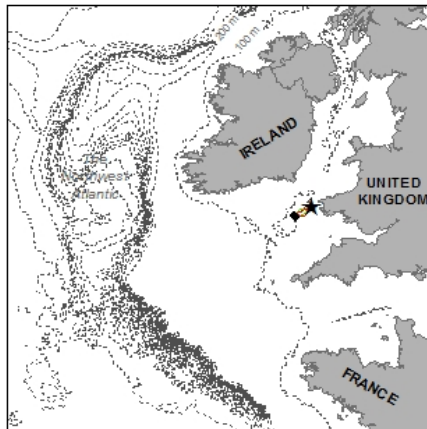

G447 - breeding male (2016, n = 2 trips)

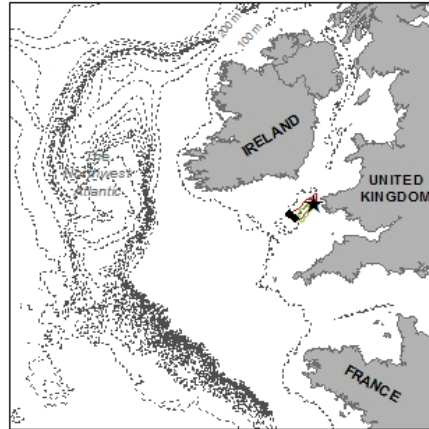

G450 - breeding female (2016, n = 2 trips)

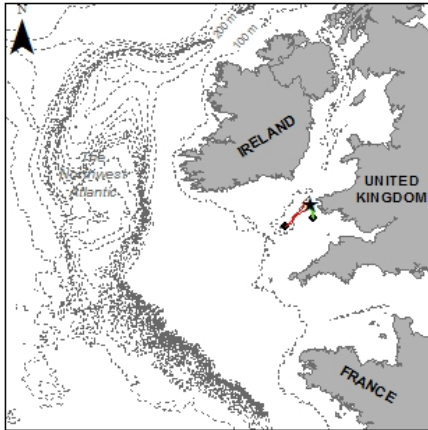

G458 - breeding female (2016, n = 2 trips)

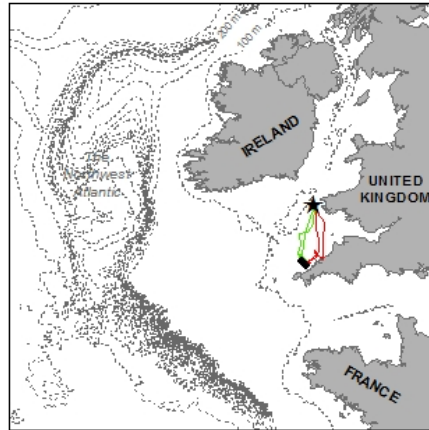

G461 - breeding male (2016, n = 4 trips)

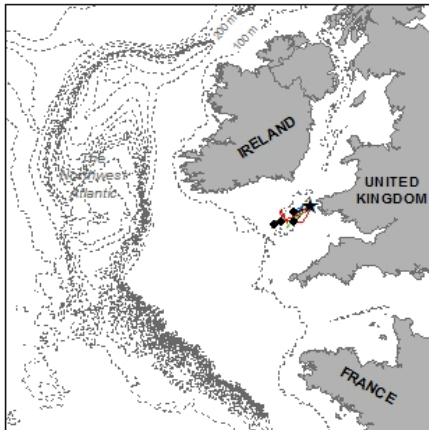

G464 - breeding male (2016, n = 3 trips)

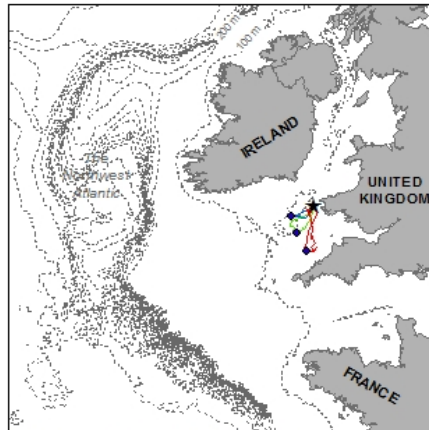

G466 - breeding male (2016, n = 2 trips)

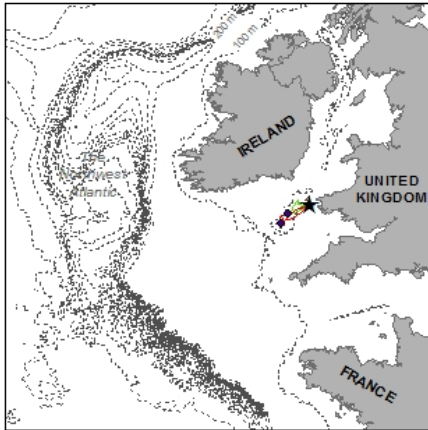

G469 - breeding male (2016, n = 5 trips)

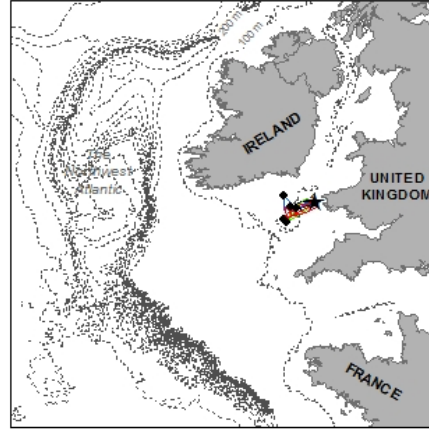

G415 - breeding male (2016, n = 4 trips)

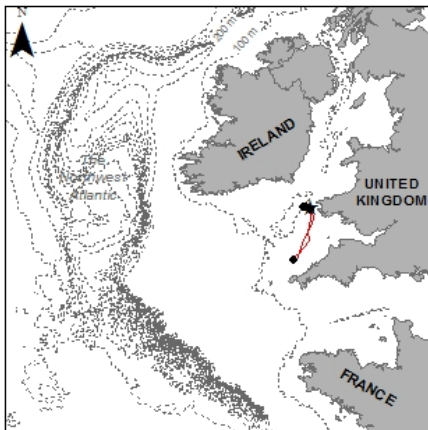

G434 - breeding male (2016, n = 2 trips)

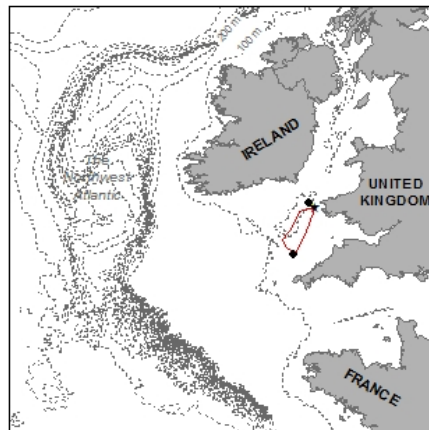

G446 - breeding female (2016, n = 2 trips)

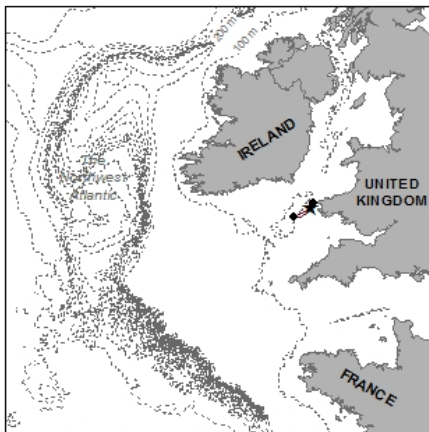

G451 - breeding female (2016, n = 2 trips)

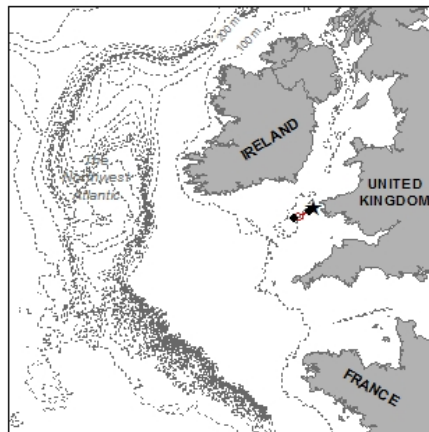

G454 - breeding female (2016, n = 2 trips)

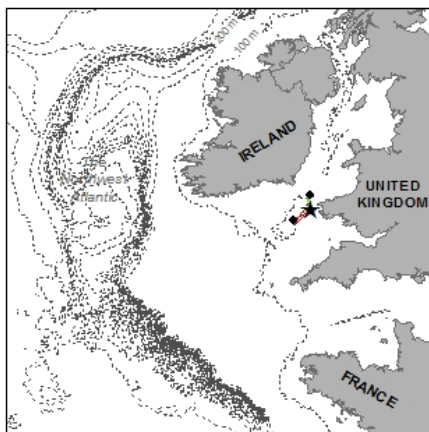

G011 - breeding male (2010, n = 5 trips)

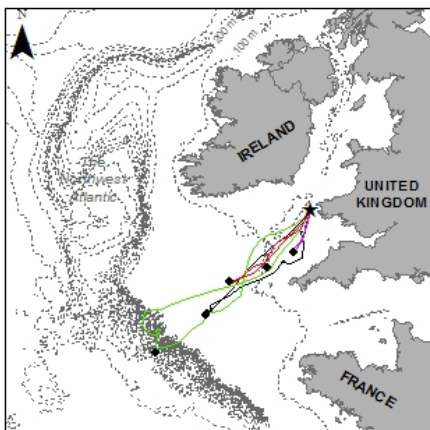

G019 - breeding female (2010, n = 8 trips)

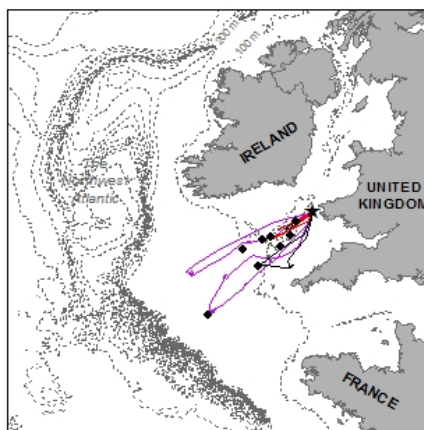

G368 - breeding male (2015, n = 2 trips)

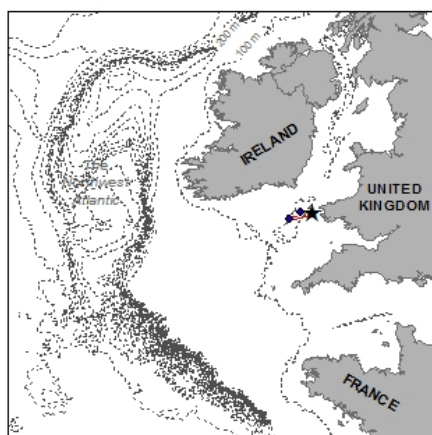

G359 - breeding female (n = 2 trips)

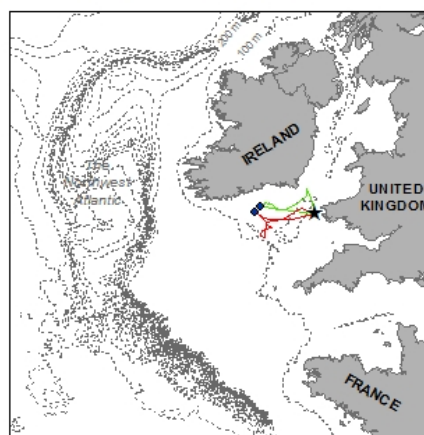

G372 - breeding male (2015, n = 3 trips)

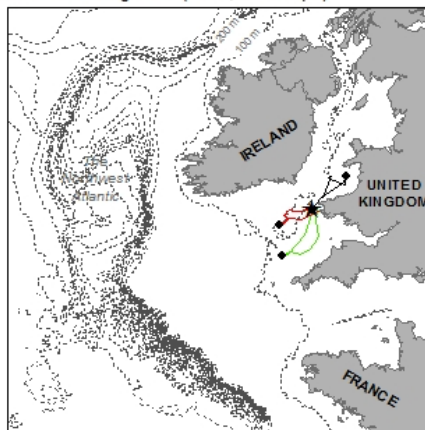

**Electronic supplementary material, figure 3.** Repeat central place foraging tracks of (n=15) immature northern gannets (aged 2-3 years) from Grassholm, UK, July and August 2010, 2015 and 2016 generated from GPS-PTT and GPS-GSM tags. Tracks are colour-coded by number: track 1=black; track 2=blue; track 3=red; track 4 = green; track 5 = purple. Data is presented for 8 males and 7 females.

57619 - immature female (2010, n = 4 trips)

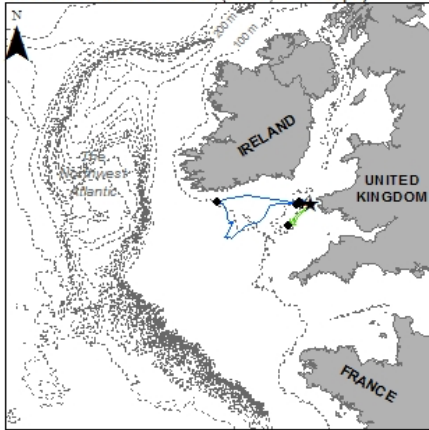

57629 - immature female (2010, n = 4 trips)

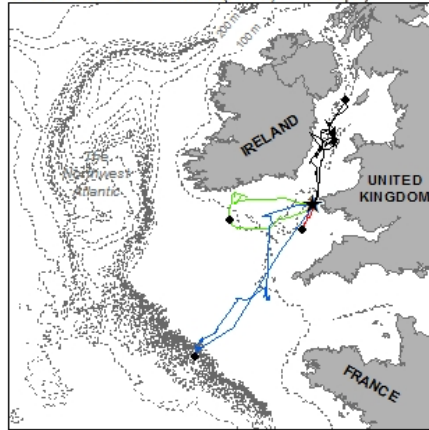

57621 - immature female (2010, n = 4 trips)

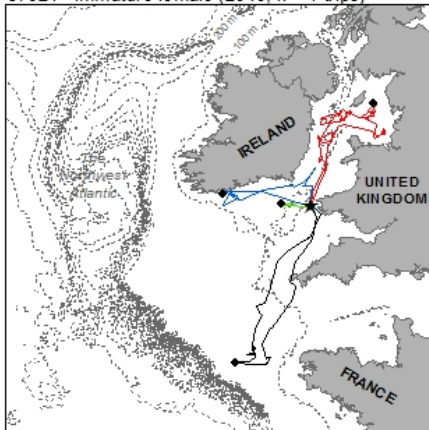

57628 - immature female (2010, n = 4 trips)

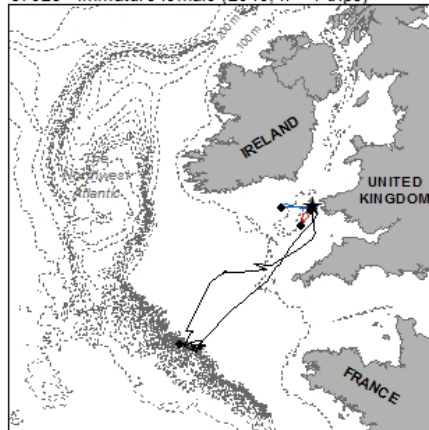

57631 - immature female (2010, n = 4 trips)

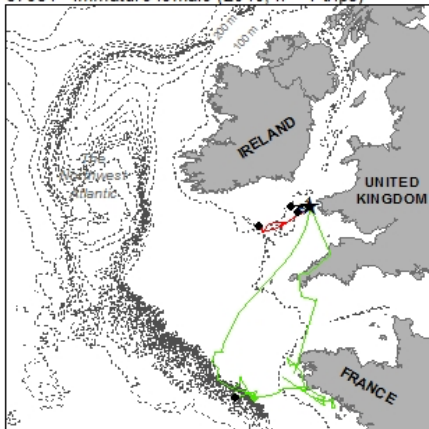

57633 - immature female (2010, n = 4 trips)

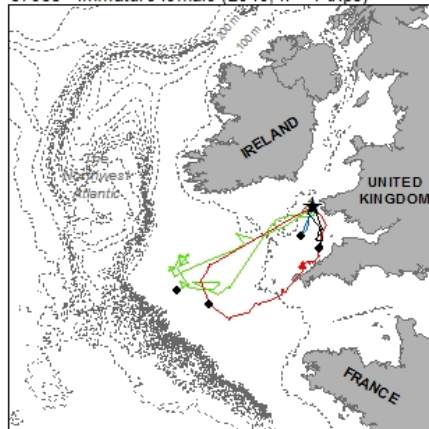

57634 - immature male (2010, n = 4 trips)

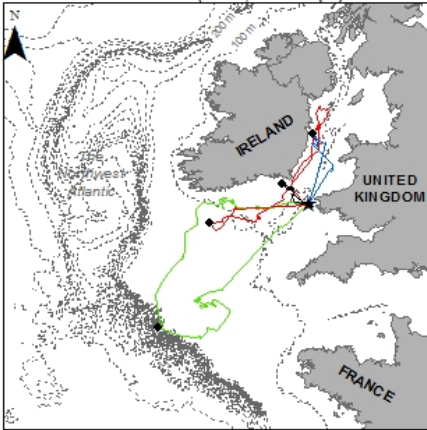

57643 - immature male (2010, n = 2 trips)

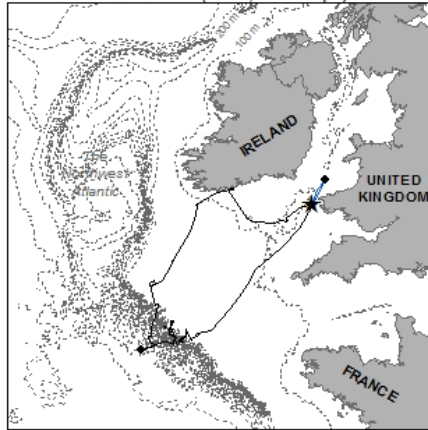

G394 - immature male (2015, n = 4 trips)

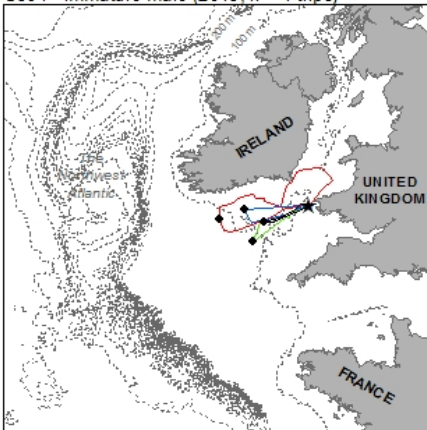

G395 - immature female (2015, n = 5 trips)

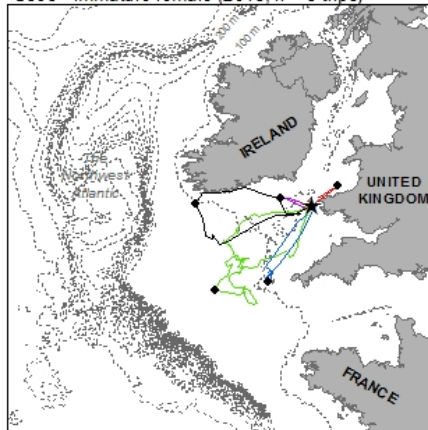

G401 - immature male (2015, n = 3 trips)

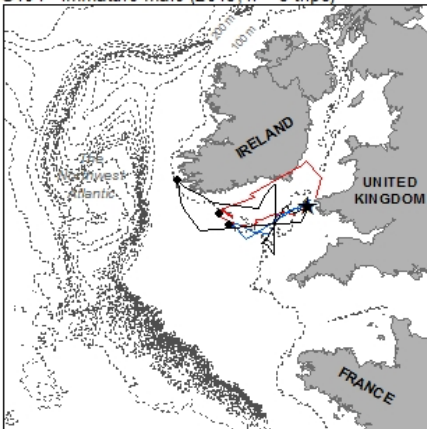

G407 - immature female (2015, n = 4 trips)

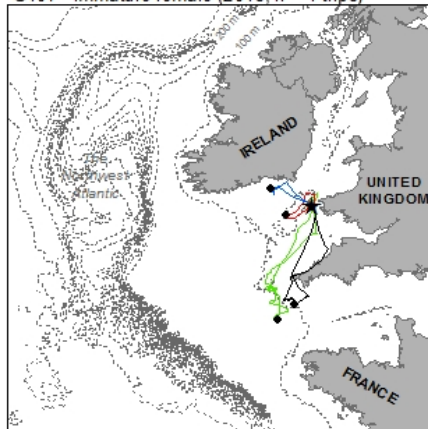

G429 - immature male (2016, n = 5 trips)

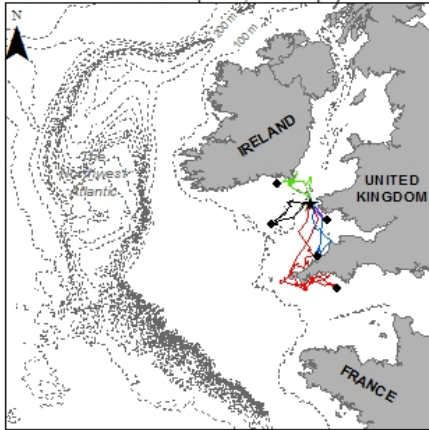

G430 - immature male (2016, n = 7 trips)

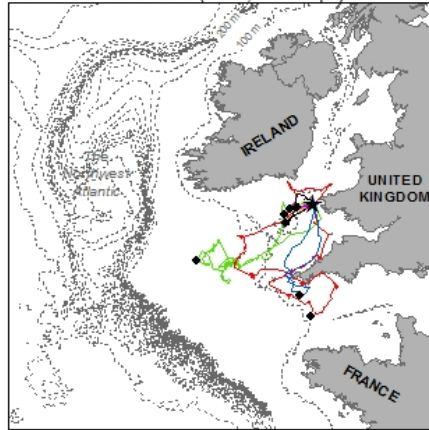

G433 - immature male (2016, n = 8 trips)

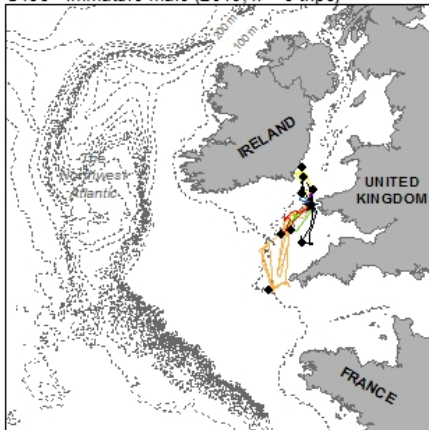



**Electronic supplementary material, figure 4.** Repeat central place foraging tracks of (n=5) failed or sabbatical breeding northern gannets from Grassholm, UK, July 2015. Tracks are colour-coded by number: track 1=black; track 2=blue; track 3=red; track 4 = green.

G071 - failed breeder male (2015, n = 3 trips)

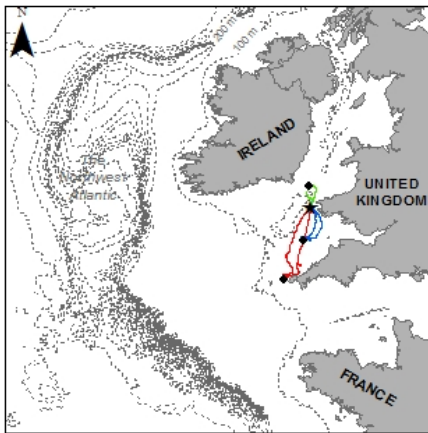

G075 - failed breeder male (2015, n = 4 trips)

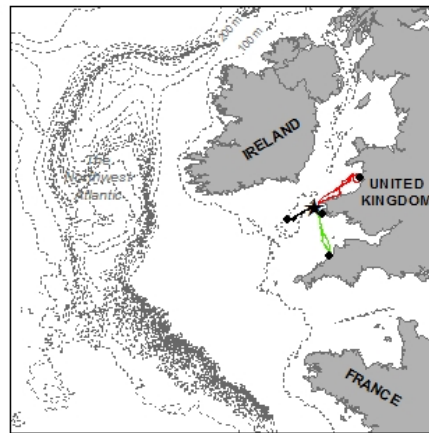

G135 - failed breeder male (2015, n = 2 trips)

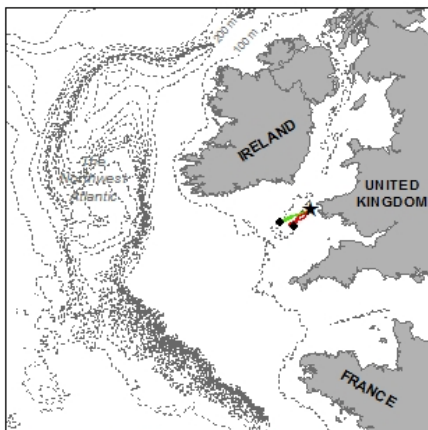

G278 - failed breeder female (2015, n = 2 trips)

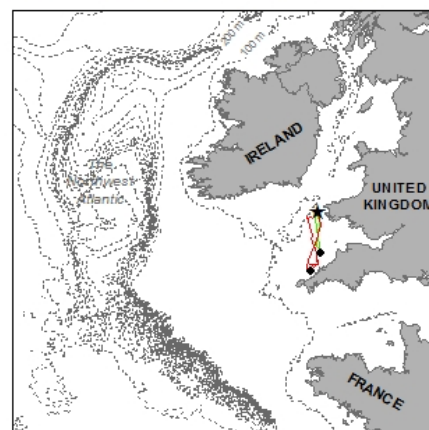

G323 - failed breeder female (2015, n = 4 trips)

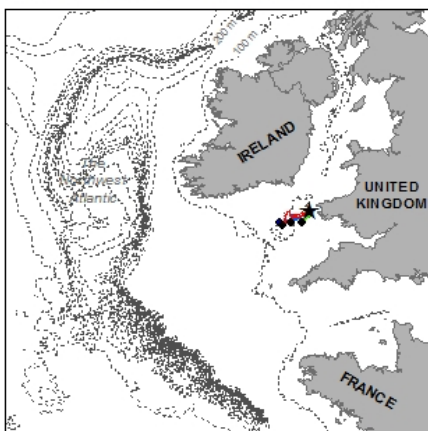

Supplement: rspb20171068supp1.pdf [file rspb20171068supp1.pdf]
